1           **The molecular basis of genetic interaction diversity in a metabolic pathway**

2

3   Harry E. Kemble<sup>1,2</sup>, Catherine Eisenhauer<sup>1</sup>, Alejandro Couce<sup>1,3</sup>, Audrey E. Chapron<sup>1</sup>,

4   Mélanie A. Magnan<sup>1</sup>, Gregory Gautier<sup>4,5</sup>, Hervé Le Nagard<sup>1</sup>, Philippe Nghe<sup>2</sup>, Olivier

5   Tenaillon<sup>1\*</sup>

6

7   <sup>1</sup>Infection, Antimicrobials, Modelling, Evolution, INSERM, Unité Mixte de Recherche 1137,

8   Université Paris Diderot, Université Paris Nord, 75018 Paris, France

9   <sup>2</sup>École Supérieure de Physique et de Chimie Industrielles de la Ville de Paris (ESPCI Paris),

10   PSL Research University, UMR CNRS-ESPCI CBI 8231, 10 Rue Vauquelin, 75231 Paris

11   Cedex 05, France

12   <sup>3</sup>Department of Life Sciences, Imperial College, London, SW7 2AZ, UK

13   <sup>4</sup>Centre de Recherche sur l'Inflammation, INSERM, UMRS 1149, 75018 Paris, France

14   <sup>5</sup>Laboratoire d'Excellence INFLAMEX, Université Paris Diderot, Sorbonne Paris Cité, 75018

15   Paris, France

16

17

18

19

20

21

22 **Metabolic imbalances underlie a large spectrum of diseases, spanning congenital and**  
23 **chronic conditions and cancer<sup>1</sup>. Our ability to explain and predict such imbalances**  
24 **remains severely limited by the diversity of underlying mutation effects and their**  
25 **dependence on the genetic background and environment<sup>2-6</sup>, but it is unclear whether**  
26 **these complicating factors can be reduced to simple quantitative rules. Here, we**  
27 **characterise their interplay in determining cell physiology and fitness by systematically**  
28 **quantifying almost 4,000 interactions between expression variants of two genes from a**  
29 **classical sugar-utilisation pathway containing a toxic metabolite in the model**  
30 **bacterium, *Escherichia coli*, in different environments. We detect a remarkable variety**  
31 **of types and trends of intergenic interaction in this linear pathway, which cannot be**  
32 **reliably predicted from the effects of each variant in isolation, along with a dependence**  
33 **of this epistasis on the environment. Despite such apparent complexity, the fitness**  
34 **consequences of interactions between alleles and environment are explained by a**  
35 **mechanistic model accounting for catabolic flux and toxic metabolite concentration.**  
36 **Our findings reveal how, contrary to a common assumption<sup>7-13</sup>, the nature of fitness**  
37 **interactions is governed by more than just the topology of the molecular network**  
38 **underlying a selected trait. Our prospects of predicting disease and evolution will**  
39 **therefore improve by expanding our knowledge of the links among proteome,**  
40 **metabolome and physiology<sup>14</sup>.**

41

42 Organismal traits are the manifestation of complex molecular interaction networks spanning  
43 multiple scales of biological organisation, which themselves interact with the environment<sup>15</sup>.  
44 The rise of omics technologies is enabling increasingly detailed structural models of these  
45 networks<sup>16</sup>, offering hope that gene interactions underlying important traits might be directly  
46 deduced from their topologies<sup>7-13</sup>. Direct measurements supporting this hypothesis are

47 however limited to one<sup>10,17,18</sup>, or occasionally a few<sup>18</sup>, variants of each gene (typically  
48 deletions). To examine whether such predictability applies more generally, we developed an  
49 experimental system with which to characterise the interactions between many alleles of two  
50 metabolic genes, along with their dependence on environmentally modulated gene  
51 expression, a common non-genetic mechanism for the modification of traits<sup>5,19</sup>.

52

53 Our system was composed of two genes, *araA* and *araB*, encoding the enzymes responsible  
54 for the first two steps of *E. coli* L-arabinose catabolism<sup>20</sup>: L-arabinose isomerase (AraA) and  
55 L-ribulokinase (AraB), who together transform L-arabinose into the intermediate, L-ribulose-  
56 5-phosphate (Fig. 1a). L-ribulose-5-phosphate enters the pentose phosphate pathway (PPP) of  
57 central metabolism *via* further enzymatic reactions, ultimately supporting cell growth, but is  
58 itself toxic to *E. coli*, retarding growth when it accumulates<sup>21</sup>. Environmental modulation of  
59 gene expression was achieved by placing each of the two genes under an independent,  
60 chemically inducible promoter (Supplementary Methods).

61

62 For each promoter, 36 single-base variants were constructed, along with the initial “wildtype”  
63 sequence, and combined with all variants of the other promoter (Fig. 1b). The ultimate  
64 phenotype, competitive fitness, was then measured for the entire set of 1,369 genotypes under  
65 three different inducer concentration combinations (Figs. 1c-d; Supplementary Methods;  
66 Supplementary Tables 1-5). Fitness was measured by tagging the mutant library with  
67 molecular barcodes (tens to thousands per genotype) (Extended Data Figures 1 and 2),  
68 culturing the pooled library for ~30 mean generations, and tracking barcode frequencies over  
69 time with Next-Generation Sequencing (Extended Data Figure 3). The barcodes act as  
70 internal replicates for every genotype, enabling precise fitness estimates at high-throughput

71 (log relative fitness,  $F^{rel}$ , median standard deviation of 0.0011 for single mutants and 0.0047  
72 for double mutants; Extended Data Figure 4).

73

74 The overall distribution of fitness effects depended critically on the inducer environment  
75 (Fig. 2a; Extended Data Figure 5a; Supplementary Table 6): most mutants were fitter than the  
76 wildtype in Env<sub>1</sub> (88% beneficial, median  $F^{rel} = 0.12$ ), most were less fit in Env<sub>2</sub> (88%  
77 deleterious, median  $F^{rel} = -0.12$ ), and about half were fitter and half were less fit in Env<sub>3</sub>  
78 (44% and 51%, respectively; median  $F^{rel} = -0.03$ ). The correlation between fitness effects in  
79 different environments varied from strongly positive (Env<sub>1</sub>-Env<sub>3</sub>, Pearson's  $r=0.74$ ,  
80  $p<2.2\times 10^{-16}$ ) to weakly positive (Env<sub>2</sub>-Env<sub>3</sub>, Pearson's  $r=0.26$ ,  $p<2.2\times 10^{-16}$ ) and weakly  
81 negative (Env<sub>1</sub>-Env<sub>2</sub>, Pearson's  $r=-0.11$ ,  $p=1\times 10^{-4}$ ) (Extended Data Figure 5b), demonstrating  
82 that genotype fitness in one environment can be an extremely poor predictor of fitness in  
83 other environments. At the level of individual alleles, all but one had changing patterns of  
84 effects across environments (Fig. 2b). In some environments, they were universally beneficial  
85 or deleterious across genetic backgrounds, and in others they switched between being  
86 beneficial and deleterious depending on the allele at the second promoter. This pervasive and  
87 inconsistent variability poses a clear challenge for the prediction of mutation effects.

88

89 To characterise the context-dependency of mutation effects, we examined the sign, strength  
90 and type<sup>22</sup> of intergenic fitness epistasis arising between the set of *araA* and *araB* promoter  
91 variants in each environment (Fig.3a, Extended Data Figure 6a). These all depended both on  
92 the environment and on the sign of the fitness effects of the two interacting mutations. Of all  
93 mutation pairs for which epistasis could be computed, the fraction exhibiting any kind of  
94 significant interaction varied from 89% (Env<sub>1</sub>) to 81% (Env<sub>3</sub>) and 39% (Env<sub>2</sub>). Beneficial

95 pairs tended to interact negatively (89%, 72% and 100% of all significant interactions in  
96 Env<sub>1-3</sub>, respectively), and deleterious pairs, positively (100% (1/1), 97% and 98%,  
97 respectively), a trend of *antagonism* reported for several other systems<sup>23</sup>. Interactions  
98 between beneficial and deleterious mutations could be mostly positive or mostly negative,  
99 depending on the environment and on which gene carried the beneficial/deleterious mutation.  
100 This epistatic diversity extended to individual mutation pairs, with more than 20% interacting  
101 both positively and negatively across environments (Extended Data Figures 6b and 6c).  
102 Concerning epistasis type (Fig. 1d), sign epistasis, which occurs when the sign of a mutation  
103 effect changes in the presence of a second mutation, represented 31% of significant  
104 interactions in Env<sub>1</sub>, 17% in Env<sub>2</sub> and 34% in Env<sub>3</sub>. Negative sign epistasis was even more  
105 frequent among beneficial mutations, comprising 35% of significant interactions between  
106 them in Env<sub>1</sub>, 33% in Env<sub>2</sub> and 60% in Env<sub>3</sub>. Importantly, some kinds of interaction arose in  
107 only one or two environments (*eg.* negative reciprocal sign epistasis), suggesting a critical  
108 role for the environment in determining possible genetic interactions.

109

110 Confronted with such a variety of interactions, we asked whether they might be quantitatively  
111 understood in terms of the fitness effects of the interacting mutations, as has been found for  
112 some other mutation sets<sup>24</sup>. We found that the effects of individual mutations were weakly  
113 predictive of the type and value of epistasis they exhibited with mutations at the second  
114 promoter (Fig. 3a scatterplots). In all environments, there was a significantly negative  
115 correlation between the sum of individual fitness effects and the value of epistasis (Pearson's  
116  $r = -0.36, -0.37, -0.51$  in Env<sub>1-3</sub>, respectively;  $p < 2.2 \times 10^{-16}$  for all), a trend of *diminishing*  
117 *returns* that appears common across experimental systems<sup>24</sup> (Extended Data Figure 7a).  
118 However, when the two genes were considered separately, the relationship between  
119 individual fitness effects and epistasis was found to be markedly different between *araA* and

120 *araB*: the negative correlation was stronger for  $P_{LtetO-1}$ -*araA* mutations being added to existing  
121  $P_{LlacO-1}$ -*araB* mutations than for the inverse case (Extended Data Figures 7b and 7c; Pearson's  
122  $r = -0.67, -0.73, -0.63$  in  $Env_{1-3}$ ,  $p < 2.2 \times 10^{-16}$  for all, vs.  $0.12, -0.20$  and  $-0.34$ ,  $p < 1.6 \times 10^{-5}$   
123 for all), in which the correlation can even be positive, an extremely rare trend in existing  
124 studies<sup>24</sup>. Moreover, we found that the average trend was in some cases strikingly non-  
125 monotonic (Extended Data Figures 7b and 7c), revealing that different alleles of a particular  
126 promoter can cause similar fitness changes on their own but interact very differently with  
127 alleles at the second promoter.

128

129 The relationship between individual mutation effects and epistasis was further complicated  
130 by the fact that it could be different for different alleles of the *same* promoter. For example,  
131 in  $Env_1$ , it is the numerous individually beneficial  $P_{LtetO-1}$ -*araA* mutations which cause the  
132 average negative trend with  $P_{LlacO-1}$ -*araB* background fitness, with many of them even  
133 becoming deleterious in high-fitness backgrounds. The rare individually deleterious  $P_{LtetO-1}$ -  
134 *araA* mutations behave differently, however, with certain of them causing a fairly consistent  
135 reduction in fitness regardless of the background (Fig. 3b, top panel). For individual  $P_{LlacO-1}$ -  
136 *araB* mutations in  $P_{LtetO-1}$ -*araA* backgrounds, the relationship was consistently non-  
137 monotonic, but had a different average direction for individually beneficial or deleterious  
138 alleles (Fig. 3b, bottom panel). Moreover, the trend for a given allele could vary greatly with  
139 the environment (Extended Data Figures 7b and 7c). These results demonstrate that genes  
140 interacting simply through their common participation in a linear pathway can exhibit  
141 complex, allele- and environment-dependent trends of epistasis. The smooth patterns  
142 exemplified by Fig. 3b, however, suggest that they may in principle be understood from an  
143 underlying phenotypic mechanism.

144

145 To this end, we constructed a quantitative model of the metabolic pathway, where fitness  
146 results from a balance between the benefit of catabolic flux<sup>25</sup> and the costs of intermediate  
147 toxicity<sup>26,27</sup> and AraA and AraB protein expression<sup>28</sup>. Each promoter mutation was then  
148 characterised as a change in the controlled expression of AraA or AraB. Because most  
149 mutations lay outside of the repressor binding sites governing promoter inducibility (Fig. 1b),  
150 the fold-change in enzyme expression/activity caused by each mutation was kept constant  
151 across inducer environments. Parameters describing the fitness function, wildtype activities in  
152 the 3 environments and expression effects of individual mutations were then optimised to  
153 match the observed data (Supplementary Table 7; Extended Data Figure 8a).

154

155 The fitted model is in excellent agreement with our data, yielding  $r^2$  values of 0.98 between  
156 experimental and simulated fitness effects and 0.82 between experimental and simulated  
157 epistasis coefficients (fig. 4a; Extended Data Figure 8b; see Extended Data Figure 9 for  
158 alternative models). There is only one allele whose qualitative behaviour across environments  
159 is not well captured by the model (Extended Data Figure 8b): G7A of P<sub>L<sub>letO-1</sub></sub>-*araA*,  
160 interestingly the only one conferring a directionally consistent fitness effect across all  
161 environments (Fig. 2b), presumably because the direction of its effect on *expression* depends  
162 on inducer concentration (supported by the fact that the mutated position overlaps the  
163 repressor binding site (Fig. 1b)). Notably, the model is capable of recapitulating the diverse  
164 and complex trends of epistasis seen in the data (Fig. 4b, Extended Data Figure 8c). In  
165 particular, we find that the non-monotonic relationships between single-mutant fitness and  
166 the fitness impact of alleles at the second promoter are well explained by the single mutants  
167 lying at two sides of a phenotypic optimum (Fig. 4b). This is a relatively common

168 phenomenon in our dataset, mostly because L-ribulose-5-phosphate toxicity results in a  
169 particular flux being optimal for fitness<sup>26,27</sup> (Extended Data Figure 10). Two alleles of the  
170 same gene may thus result in similar fitness changes individually but cause substantially  
171 different expression levels and fluxes, resulting in different interactions with mutations in the  
172 second gene. This is principally due to enzymes possessing different degrees of flux control  
173 on each side of the optimum, with lower levels of one resulting in the second having less  
174 control.

175

176 The model reveals how the biology underlying a linear pathway can result in heterogeneous,  
177 environmentally dependent intergenic interactions. When fitness depends solely on flux<sup>25,27</sup>,  
178 as is assumed in Flux Balance Analysis<sup>29</sup>, the nature of epistasis should be guaranteed by  
179 pathway topology alone<sup>27</sup>. Under the slightly more complex selection pressure resulting from  
180 metabolite toxicity<sup>26,27</sup> and gene expression costs, however, interactions can be both  
181 antagonistic and synergistic<sup>27</sup>. We find that epistatic categories form several localised zones  
182 over the fitness landscape, their size and position dependent on the wildtype phenotype, in  
183 turn controlled by the environment (Fig. 4c; Extended Data Figure 8d). In a smooth landscape  
184 such as this, sign epistasis can occur when there is an overshoot<sup>30</sup> of the phenotypic optimum  
185 in one (simple) or both (reciprocal) planes. Encouragingly, epistatic zones are generally large  
186 and orderly enough to make the type of interaction experienced by two mutations in different  
187 environments predictable, but only through knowledge of the underlying landscape and the  
188 position of the relevant genotypes within it.

189

190 The importance of this knowledge becomes immediately apparent when considering the  
191 existence of a disease threshold below a certain fitness (Fig. 4d). The two alleles shown can



192 lead to disease, but only when they co-occur, and only in one particular environment. The  
193 model thus provides a mechanism by which potential physiological defects can be  
194 manifested, aggravated or alleviated by particular combinations of alleles and environments<sup>2-</sup>  
195 <sup>5</sup>. Insight into intergenic fitness landscapes for other biological systems, and for genes  
196 connected by more complex topologies, will be indispensable for progress across medicine,  
197 bio-engineering and evolution.

198

199

200

## Methods

201

### 202 Plasmid construction

203 Our library creation strategy depended on two plasmids, pKH1511c and pKH1511d, which  
204 were created in this study. pKH1511c serves as the library “backbone”, carrying all the  
205 necessary elements of the final plasmid library except for the  $P_{LtetO-1}$  and  $P_{LlacO-1}$  promoters  
206 destined to drive *araA* and *araB* expression, respectively: *p15A* origin-of-replication, *lacI-*  
207 *tetR* repressor cassette (for inducibility of  $P_{LtetO-1}$  and  $P_{LlacO-1}$ ), *araA* and *araB*. *araA* and *araB*  
208 ORFs (with their upstream ribosome binding site-containing regions) are divergently oriented  
209 (with each followed by an artificial transcriptional terminator), and are separated by 2  
210 restriction sites to allow easy insertion of divergently oriented  $P_{LtetO-1}$  and  $P_{LlacO-1}$  promoters.  
211 pKH1511d serves as a template for amplification of a *bsd* blasticidin S-resistance cassette  
212 with primers containing the  $P_{LtetO-1}$  and  $P_{LlacO-1}$  variant sequences, allowing their eventual  
213 insertion into pKH1511c (Extended Data Figure 1). pKH1511d replication is *pir*-dependent,  
214 abolishing the occurrence of false-positive colonies caused by PCR template carryover during  
215 library cloning. Plasmids, DNA fragments, PCR primers and bacterial strains used in the  
216 construction of these two plasmids are detailed in Supplementary Tables 1-4, respectively,  
217 and detailed cloning methods are provided in Supplementary Methods.

218

### 219 Strain engineering/adaptation

220 The final library host strain, *E. coli* MG1655  $\Delta araBA$  D-*ara*<sup>+/*evo*</sup>  $\Delta fucK$   $\Delta lacIZYA::cat$  D/L-  
221 *ara*<sup>evo</sup> (Supplementary Table 4), was originally designed to possess a rewired D-arabinose  
222 metabolism<sup>31–33</sup>, in which *araB* (but not *araA*) participates. D-arabinose was not used in this

223 study, however, so this feature ( $D\text{-ara}^{+/evo} \Delta fucK$ ) is not relevant here. In addition, *araA* and  
224 *araB* ORFs were removed from the chromosome, to allow them to be expressed exclusively  
225 from plasmids (the 3<sup>rd</sup> gene of the *araBAD* operon, *araD*, was kept on the chromosome under  
226 the control of its native L-arabinose-responsive promoter, as were the transcriptional  
227 regulator gene, *araC*, and the transporter genes, *araE*, *araFGH* and *araJ*; given the all-or-  
228 nothing response of the positive feedback loop governing L-arabinose uptake, all these genes  
229 are expected to be maximally induced by internal L-arabinose by the time of fitness  
230 measurement<sup>34</sup>). Further, *lacIZYA* was replaced by a *cat* chloramphenicol-resistance cassette.  
231 This allows the use of IPTG to control the artificial promoter,  $P_{LacO-1}$ , in the absence of any  
232 effects resulting from induction of the native *lac* operon, and the absence of *lacY* also causes  
233 this control to be titratable rather than all-or-nothing<sup>35</sup>. Finally, this strain was transformed  
234 with plasmid pKH1503a (which carries an *araBA* cassette under the control of  $P_{LacO-1}$ ;  
235 Supplementary Table 1) and briefly adapted to M9 with alternating D-/L-arabinose (see  
236 above) in the presence of a low concentration of IPTG. This adaptation step was included to  
237 allow fixation of any mutations conferring a very high fitness advantage to our engineered  
238 strain in our approximate experimental conditions, to avoid them interfering with mutant  
239 library competition experiments. Detailed strain engineering methods are provided in  
240 Supplementary Methods.

241

## 242 **Library creation strategy**

243 On the evolutionary scale, direct changes in the total cellular activity of a particular enzyme  
244 can occur through either regulatory mutations, which alter the concentration of active  
245 enzyme, or structural mutations, which can effect both active enzyme concentration and  
246 kinetic parameters. A common target of regulatory mutations is the promoter<sup>36</sup>, which

247 controls a protein's expression level by determining transcription rate, and we decided to  
248 focus on promoter mutations in this study. We first placed *araA* and *araB* under the control  
249 of the well-known artificial, chemically-inducible promoters,  $P_{LtetO-1}$  and  $P_{LlacO-1}$ , developed  
250 by Lutz and Bujard<sup>37</sup>. They are each regulated by a single transcription factor (*tetR* repressor  
251 for  $P_{LtetO-1}$  and *lacI* repressor for  $P_{LlacO-1}$ ), and can be specifically induced to different levels  
252 by addition of a small, non-metabolisable compound (aTc for  $P_{LtetO-1}$  and IPTG for  $P_{LlacO-1}$ ).  
253 We focussed mutagenesis on the RNA polymerase-binding sites (-35 and -10 hexamers) of  
254 the two promoters, as these sites are known to be the most significant determinants of  
255 expression level in the core promoter<sup>38,39</sup>. Conveniently, these sites are identical between  
256  $P_{LtetO-1}$  and  $P_{LlacO-1}$ , coming from phage lambda  $P_L$  in both cases<sup>37</sup>. For each promoter, we  
257 constructed all possible single-bp substitutions over this 12bp region (36 mutants for each  
258 promoter), along with the wildtype sequence. All 37 sequence variants of the two promoters  
259 were combined together, resulting in a plasmid library containing: all 1,296 double-promoter  
260 mutants, all 36 single-promoter mutants for each promoter (one promoter is mutated, the  
261 other is wildtype) and the full wildtype (both promoters are wildtype). The majority of  
262 mutations in the RNA polymerase-binding sites are expected to have little or no effect on  
263 repressor binding, and their relative effect on expression should be similar across different  
264 inducer concentrations<sup>40,41</sup>. However, one of the -10 bases on  $P_{LtetO-1}$  overlaps with a *tet*  
265 operator, and three of the -35 bases on  $P_{LlacO-1}$  are expected to overlap with a *lac* operator<sup>37</sup>  
266 (Extended Data Figure 1), meaning that the effect on expression of mutations at these  
267 positions could depend strongly on inducer concentration<sup>42</sup>.

268 The overall structure of the plasmid on which the library is based is shown in Extended Data  
269 Figure 1. *araA* and *araB* are divergently expressed from  $P_{LtetO-1}$  and  $P_{LlacO-1}$  promoters,  
270 respectively. These two promoters are separated from each other by a short *bsd* blasticidin S  
271 resistance<sup>43</sup> cassette, in order to reduce any physical interactions between them. The presence

272 of a resistance cassette between the promoters also considerably increased cloning efficiency,  
273 as explained below, and *bsd* in particular was chosen for its small size (396 bp ORF), making  
274 it possible to sequence both promoters on a single amplicon using paired-end Illumina  
275 technology (Extended Data Figure 1). The promoters' repressors, *tetR* and *lacI*, were  
276 included on the plasmid.

277 Plasmid molecules were also intergenically tagged with unique DNA barcodes, similarly to  
278 reference<sup>44</sup> (Extended Data Figure 1). These were used to help overcome the problem of PCR  
279 and sequencing errors and to increase the precision of mutant fitness estimates by providing  
280 many independent frequency trajectories for each mutant (Extended Data Figures 2-4). The  
281 barcodes thus also allowed us to account for anomalous lineages containing off-target  
282 mutations (present in the initial library) and *de novo* mutations (arising during competition  
283 assays). They consist of 20 random nucleotides, split into 4 blocks of 5<sup>45</sup> to avoid the creation  
284 of restriction sites used in a later sequencing step: N<sub>5</sub>ATN<sub>5</sub>ATN<sub>5</sub>ATN<sub>5</sub>. Barcodes were  
285 inserted downstream of the *lacI-tetR* cassette, far from the P<sub>LtetO-1</sub> and P<sub>LlacO-1</sub> promoters, to  
286 avoid any effects on *araA* and *araB* expression, and so are expected to be effectively neutral  
287 for fitness (Extended Data Figure 1). Care was taken throughout to avoid loss of library  
288 complexity (Extended Data Figure 2), and quality controls were employed at each step of  
289 library construction.

290 The pooled plasmid library was constructed using standard restriction-ligation cloning  
291 (Extended Data Figure 1). Due to their short length, promoter sequences could be introduced  
292 facing outwards on the 5' ends of PCR primers that were used to amplify a *bsd*<sup>43</sup> blasticidin  
293 S-resistance cassette from plasmid pKH1511d (P<sub>LtetO-1</sub> on forward primers and P<sub>LlacO-1</sub> on  
294 reverse primers). This was done using primer pools with randomised nucleotides at each of  
295 the 12 target positions for each promoter. The primers also contained restriction sites on their  
296 5' extremities, allowing the resulting amplicon pool to be ligated into the library backbone,

297 pKH11511c, in the desired orientation. The resulting plasmid library was transformed into  
298 DH5 $\alpha$   $\Delta$ *araBA* and colonies were selected on blasticidin S. This strategy ensured that the  
299 occurrence of false-positive colonies from undigested or self-ligated vector was negligible, as  
300 a functional *ori* could only come from pKH11511c (the pKH1511d *ori* is *pir*-dependent),  
301 while *bsd* was only present in pKH1511d. Due to the use of fully-randomised nucleotides at  
302 each target position and the combinatorial way in which variants of the two promoters were  
303 cloned together, the expected genotype frequencies in this initial library are: 1/16 for WT,  
304 1/192 for each of the 72 single-promoter mutants and 1/2304 for each of the 1,296 double-  
305 promoter mutants. With this in mind, an estimated 40,000 colonies were harvested in this step  
306 to avoid loss of library complexity. Barcodes were added in a 2<sup>nd</sup> round of restriction-ligation  
307 cloning, introduced *via* a randomised PCR primer. The primer, containing fully-randomised  
308 nucleotides at 20 positions, was used to amplify the *bla*  $\beta$ -lactamase gene from plasmid  
309 pKD3<sup>46</sup>, and the resulting amplicon pool was swapped with the *aadAI*  
310 streptomycin/spectinomycin resistance gene in the plasmid library backbone. The primer  
311 contains restriction sites on its 5' extremity, one of which is used for this ligation, and another  
312 of which allows the barcodes to be moved closer to the mutated promoter region in a later  
313 step (see *Barcode-promoter association*). The barcoded plasmid library was again  
314 transformed into DH5 $\alpha$   $\Delta$ *araBA* and colonies were this time selected on ampicillin. False-  
315 positive colonies were avoided for the same reason as above, as pKD3 also has a *pir*-  
316 dependent *ori*. An estimated 100,000 colonies were harvested during this step, with the vast  
317 majority expected to contain a unique barcode. Expected barcode richness was thus: 6,250 for  
318 WT, 521 for each single-promoter mutant and 43 for each double-promoter mutant. In a final  
319 step, the engineered host strain, MG1655  $\Delta$ *araBA* D-ara<sup>+/evo</sup>  $\Delta$ *fucK*  $\Delta$ *lacIZYA::cat* D/L-ara<sup>evo</sup>,  
320 was transformed with this barcoded plasmid library, and an estimated 600,000 colonies were

321 harvested after selection on ampicillin. Detailed library creation methods are provided in  
322 Supplementary Methods.

323

### 324 **Barcode-promoter association**

325 To reveal the  $P_{LtetO-1}$  and  $P_{LlacO-1}$  promoter sequences linked to each barcode sequence,  
326 barcodes were first brought closer to the promoters by excision of the intervening region from  
327 the plasmid followed by re-circularisation<sup>44</sup>. PCR-amplification was then used to add the  
328 technical sequences necessary for paired-end Illumina MiSeq sequencing of barcode-  
329 promoter amplicons<sup>44</sup> (Extended Data Figure 1b; Supplementary Methods). The resulting  
330 amplicon library is composed of DNA fragments of the structure: P5 - i5 - N<sub>6</sub> PCR tag -  
331  $P_{LtetO-1}$  (rev) - *bsd* (rev) -  $P_{LlacO-1}$  - N<sub>20</sub> plasmid barcode - N<sub>6</sub> PCR tag - i7 - P7, which are ~1  
332 kb in size (close to the size-limit for reliable MiSeq sequencing). 300nt paired-end MiSeq  
333 sequencing allowed us to sequence the entire  $P_{LtetO-1}$  promoter on Read 1 and the plasmid  
334 barcode and entire  $P_{LlacO-1}$  promoter on Read 2 (note that Reads 1 and 2 do not overlap). For  
335 this, a 600-cycle MiSeq Reagent Kit v3 (Illumina) was used, and DNA was loaded at a  
336 concentration of 12pM, with a 20% PhiX DNA spike-in (PhiX Control v3, Illumina).  
337 Preliminary quality filtering and demultiplexing by the standard MiSeq software package  
338 (Illumina) resulted in an output of > 22M read pairs, giving an expected coverage of > 220X  
339 for each plasmid barcode. These read pairs were processed to associate every  $P_{LtetO-1}$  -  $P_{LlacO-1}$   
340 genotype with its respective barcodes (Supplementary Methods).

341

### 342 **Mutant library competition assays**

343 The final mutant library (host strain transformed with barcoded plasmid library) was  
344 competed over ~30 mean generations (~3 days) in the presence of L-arabinose and different

345 concentrations of the inducers, aTc and IPTG. Cell density was kept low during competition  
346 ( $OD_{600} < 0.2$ ) by serial transfer into fresh medium, in order to maintain the culture in  
347 exponential phase and to avoid large changes in medium composition. Large volumes of  
348 media (100 ml) were used to avoid severe population bottlenecks during serial transfer ( $> 1 \times$   
349  $10^8$  cells each transfer). Plasmid DNA was purified from the culture at several time-points for  
350 HiSeq sequencing of plasmid barcodes. Plasmid barcode abundance serves as a proxy for the  
351 abundance of cells carrying that particular barcode. The change in frequency over time of a  
352 barcode thus provides an estimate of competitive fitness for the lineage carrying that  
353 barcode<sup>47</sup>. Since we know the  $P_{LtetO-1}$ - $P_{LlacO-1}$  sequence associated to each barcode (see  
354 *Barcode-promoter association*), this in turn provides us with a distribution of fitness  
355 estimates for every mutant. Detailed competition assay methods are provided in  
356 Supplementary Methods.

357 The base competition medium consisted of M9 + 0.1% casamino acids (for basal growth) +  
358 0.03% L-arabinose, with 100  $\mu$ g/ml ampicillin to select against plasmid loss. A preliminary  
359 competition experiment was performed under inducer concentrations of 20 ng/ml aTc and 30  
360  $\mu$ M IPTG, expected to endow the wildtype with near-maximal fitness (although this was  
361 found to be inaccurate). A second round of competition experiments was carried out at a later  
362 date and was comprised of three different inducer concentration combinations. One  
363 duplicated those of the initial experiment to check reproducibility (Extended Data Figures 3  
364 and 4), and the other two were: 5 ng/ml aTc and no IPTG, and 200 ng/ml aTc and no IPTG.  
365 No IPTG was chosen to reduce *araB* expression as much as possible, as the preliminary  
366 experiments suggested that the wildtype over-expressed *araB* even in the absence of  
367 inducer<sup>48</sup>, due to promoter leakiness. The range of aTc was chosen to explore near-minimal  
368 and maximal *araA* expression.

369



## 370 **Barcode-sequencing of competed mutant library**

371 To track plasmid barcode frequencies throughout the competition experiments, barcodes were  
372 PCR-amplified from plasmid DNA in 2 steps, as for *Barcode-promoter association*, to add  
373 technical sequences necessary for 100nt overlapping paired-end Illumina HiSeq sequencing  
374 (Supplementary Methods). This was performed for time-points  $t_0$ ,  $t_1$ ,  $t_2$ ,  $t_4$ ,  $t_6$  and  $t_8$   
375 (approximately 0, 4, 9, 19, 29 and 39 mean generations) for the preliminary experiment, and  
376  $t_1$ ,  $t_2$ ,  $t_4$  and  $t_6$  for the later experiments. These time-points were chosen with the aim of  
377 obtaining precise fitness estimates for both large-effect and small-effect mutations<sup>49</sup>.  
378 Preliminary quality filtering and demultiplexing (Integragen, Evry, France) resulted in ~18 M  
379 read pairs per time-point per competition experiment, giving, for each point, an expected  
380 barcode coverage of ~200X and an expected mutant coverage of >14,000X. Processing of  
381 these read pairs is described in Supplementary Methods.

382

## 383 **Estimation of competitive fitness and epistasis**

384 We found that competitive fitness was not constant over the course of competition, with, for  
385 example, a possible period of physiological adaptation between  $t_0$  and  $t_2$  for certain inducer  
386 environments (Extended Data Figure 3). By  $t_6$ , a substantial number of lower-fitness mutants  
387 begin to escape detection completely, and so to avoid any bias in fitness estimates we  
388 consider only the frequency changes between  $t_2$  and  $t_4$  (two time-points). We begin by  
389 removing outlier barcodes associated to the wildtype genotype, to avoid any systematic  
390 biases coming from inaccurate wildtype estimates. This was done by computing the log ratio  
391 of  $t_4$  to  $t_2$  counts for all wildtype barcodes and removing those giving values > 1.5x the inter-  
392 quartile range above (below) the upper (lower) quartile. We also removed all barcodes giving

393 < 8 reads at  $t_2$  from our dataset. For every remaining mutant barcode,  $i$ , we then estimate its  
394 log fitness relative to the wildtype as:

$$395 \quad F_i^{rel} = \frac{\ln\left(\frac{f_i^{t_4}}{\sum f_{wt}^{t_4}}\right) - \ln\left(\frac{f_i^{t_2}}{\sum f_{wt}^{t_2}}\right)}{t_4 - t_2},$$

396 where  $f_i$  is the frequency of a mutant barcode,  $\sum f_{wt}$  is the total frequency of all wildtype  
397 barcodes and  $t_4 - t_2$  is the number of mean generations between the two time-points  
398 considered (~9). We now estimate log relative fitness of a mutant  $g$ ,  $F_g^{rel}$ , as the median of  
399 that of its associated barcodes,  $F_{g_i}^{rel}$ . We use the median barcode fitness as a fitness estimate  
400 for each promoter genotype as a convenient way to filter out the many sources of error in a  
401 competition experiment (especially undetected mutations introduced during library  
402 construction, *de novo* mutations arising during competition and barcode-promoter  
403 misassignments due to PCR and sequencing errors) (Extended Data Figure 3a). The number  
404 of eligible barcodes for each promoter genotype ranges from a few to thousands (exact  
405 numbers are provided in Supplementary Table 6). Some barcodes disappear from our  
406 sequencing sample by  $t_4$ , and so are given an  $F_i^{rel}$  of  $-\text{Inf}$ . In Env<sub>1</sub> and Env<sub>3</sub>, for a very few  
407 genotypes this is the case for the majority of their barcodes, and we identify these mutants as  
408 being less fit than the wildtype but cannot estimate total/marginal fitness effects or epistasis  
409 for them.

410 To estimate the precision of mutant fitness estimates, we used standard bootstrapping of the  
411 eligible mutant and wildtype barcodes (n=1,000), each time computing the mutants' fitness,  
412  $F_g^{rel}$ , as the median fitness of their associated barcodes,  $F_{g_i}^{rel}$ . The same 1,000 sets of  
413 randomly sampled wildtype barcodes were used as the references for all mutants. The  
414 bootstrap distributions were then used to determine significance (empirical 95% confidence)  
415 for non-neutrality of total ( $F_g^{rel}$ ) and marginal ( $F_g^{margin}$ ) fitness effects, non-zero epistasis,

416 simple sign epistasis and reciprocal sign epistasis, pairing bootstrap  $F_g^{rel}$  estimates by  
417 sampled wildtype barcode set when necessary.

418 The marginal fitness change induced by adding mutation  $A$  to the genetic background  $B$  is  
419 defined as  $F_{A|B}^{marg} = F_{AB}^{rel} - F_B^{rel}$ , and epistasis between mutations  $A$  and  $B$  is defined as  
420  $\varepsilon_{AB} = F_{AB}^{rel} - (F_A^{rel} + F_B^{rel})^{50}$ .

421

## 422 **Phenotype-fitness model**

423 We consider a linear metabolic reaction path,

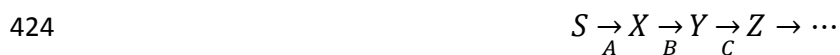

425 where  $S$  is the substrate (L-arabinose) concentration. As shown in references<sup>51,27</sup>, for  $S$  and  $Z$   
426 fixed, the steady-state flux for non-saturated enzymes and the intermediate concentration are  
427 respectively given by:

$$428 \quad \varphi = \frac{1}{1/A + 1/B + \eta} \quad (1)$$

$$429 \quad Y = D - \frac{\varphi}{1/A + 1/B} \quad (2)$$

430 where  $A$  and  $B$  are proportional to the maximum reaction rates provided by each enzyme,  $\eta$  is  
431 the inverse of the maximal flux,  $\varphi_{max}$ , as imposed by the fixed pathway steps, and  $D$  is a  
432 certain function of  $S$  and equilibrium constants (see reference<sup>51</sup> for detailed expressions). We  
433 note that the flux,  $\varphi$ , is an increasing function of  $A$  and  $B$  and saturates at  $\varphi_{max}$  for very  
434 efficient enzymes  $A$  and  $B$ , or very high concentrations of them. However, at high fluxes, the  
435 hypothesis of unsaturated downstream enzymes breaks down, and a reaction step becomes  
436 limiting, such that the concentrations of metabolic intermediates may build up to toxic levels.

437 To account for such saturation, we extend the model above by considering the full Reversible  
438 Michealis-Menten (RMM) form for the step C instead of its first order approximation (similar  
439 reasoning applies for longer paths). At steady-state, all reaction speeds must be equal, giving  
440 for the third step:

$$441 \quad \varphi = \frac{\alpha Y - \beta Z}{1 + \gamma Y + \delta Z} \quad (3)$$

442 where  $\alpha, \beta, \gamma, \delta$  are the RMM parameters for C. Equivalently, expressing Y as a function of  
443  $\varphi$ :

$$444 \quad Y = \frac{\beta Z + (1 + \delta Z)\varphi}{\alpha - \gamma\varphi} \quad (4).$$

445 We could eliminate Y by combining (2) and (4), Z being fixed, and obtain an exact  
446 expression for  $\varphi$ . Note that expression (1) is recovered for  $\delta = \gamma = 0$ , as this corresponds to  
447 the unsaturated case. In the general case,  $\varphi$  would still be an increasing function of A and B  
448 and saturate at a certain value, but its expression becomes more complicated.

449 Instead of using the full expression of  $\varphi$ , we report here an approximation with less  
450 parameters, which consistently recovers the monotonicity with A and B, and the limit  
451 regimes for unsaturated and saturated downstream steps. For this, we simply keep expression  
452 (1) for the flux, and set its saturation by the saturation of the reaction catalysed by C, as  
453 obtained in the limit of very high Y in (4):

$$454 \quad \varphi_{max} = 1/\eta = \alpha/\gamma.$$

455 With this, expression (4) becomes:

$$456 \quad Y = \frac{P + Q\varphi}{\varphi_{max} - \varphi} \quad (5)$$

457 where  $P$  and  $Q$  are functions of the fixed downstream enzyme properties and concentrations.

458 We note in particular that  $Y$  diverges when the flux becomes maximal, meaning that the

459 downstream reaction is saturated, leading to an accumulation of  $Y$ .

460 We now assume fitness to be a function of flux and the toxic intermediate (L-ribulose-5-

461 phosphate) concentration,  $Y$ , and that there exist constants  $e$  and  $f$  such that, from (1) and (5):

$$462 \quad F = e\varphi - fY = e\varphi - f \frac{P + Q\varphi}{\varphi_{max} - \varphi} \quad (6).$$

463 This expression can be further simplified by considering the low and high flux regimes:

464 For  $\varphi \ll \varphi_{max}$ , (6) behaves as  $F = -fP/\varphi_{max} + u\varphi$ , with  $u = e - f(Q + P/\varphi_{max})/$

465  $\varphi_{max}$ , the offset  $-fP/\varphi_{max}$  being determined solely by properties of the fixed downstream

466 enzyme,  $C$ . Thus, any fitness change due to mutations in  $A$  and  $B$  is of the form  $u\varphi$ .

467 For  $\varphi \sim \varphi_{max}$ , the first term of (6) remains finite while the second with numerator  $v = f(P +$

468  $Q\varphi_{max})$  diverges. Thus, replacing  $e$  by  $u$  as defined in the regime  $\varphi \ll \varphi_{max}$  has a

469 negligible contribution.

470 Introducing a basal growth rate,  $\omega$ , supplied by alternative nutrients in the medium (casamino

471 acids), fitness is then well approximated by:

$$472 \quad F = \omega + u\varphi - \frac{v}{\varphi_{max} - \varphi} \quad (7).$$

473 In addition to flux and toxic metabolite concentration, gene expression burden can also

474 contribute to fitness changes<sup>28,48,52,53</sup>. Following the observation that protein expression

475 burden depends on metabolic state<sup>54,55</sup>, we include an expression cost factor in which  $\theta_A$  and

476  $\theta_B$  describe the cost of increasing cellular enzyme activity, including potential contributions

477 from both the amount of expression and the specific enzyme activity constants:

478

$$479 \quad F = \left( \omega + u\varphi - \frac{v}{1/\eta - \varphi} \right) (1 - \theta_A A - \theta_B B) \quad (8).$$

480 This expression is considered valid only when both factors are positive. Expression (8)  
481 defines a fitness surface in the two-dimensional space of AraA and AraB activities, which  
482 together with the flux function (1) results in the 6 independent parameters,  $\omega$ ,  $u$ ,  $v$ ,  $\theta_A$ ,  $\theta_B$  and  
483  $\eta$ .

484 The entire model consists of 83 parameters: the 6 described immediately above; 5 defining  
485 the “wildtype” activity levels (AraA and AraB activities for the 3 inducer environments, with  
486 Env<sub>2</sub> and Env<sub>3</sub> having the same wildtype AraB activity, as both contained the same IPTG  
487 concentration); and 72 defining the relative impact of the single mutations (36 for each gene)  
488 on enzyme expression. For a given parameter set, the fitness,  $F^{rel}$ , of the 72 single mutants  
489 and 1,296 double mutants was computed in each of the 3 environments, relative to the  
490 respective “wildtype” fitness. As for the experimental data, the 83-parameter model thus  
491 yields 1,368 mutants, each associated to 3 different fitness measurements.

492 The model was fit using multiple Monte Carlo Markov Chains (MCMC)<sup>56</sup>. Parameters were  
493 generated randomly from uniform distributions, both initially and at each step of the chain for  
494 a randomly chosen parameter (bounds are provided in Extended Data Figure 8a and  
495 Supplementary Table 7; bounds for expression effects of inducer concentrations and a few  
496 mutations were guided by experimental expression measurements (data not shown)). 800  
497 chains, each of 300,000 steps, were simulated, and for each chain the parameter set giving the  
498 best fit with measured fitness values was stored (residuals were weighted to give equal  
499 consideration overall to single and double mutants, and were also normalised to the mean  
500 fitness effect in the environment from which they came). The distribution of goodness-of-fit  
501 values from the 800 chains was multi-modal (*ie.* convergence was not guaranteed), with ~5-

502 10% of the chains achieving a best fit residing in the lowest peak. We take the best of all  
503 these parameter sets as the most likely fit, but the distributions of parameter values from the  
504 best 2.5% of chains are also provided in Extended Data Figure 8a and Supplementary Table  
505 7.

506 Several fitness function variations containing less parameters than the one presented in the  
507 main text were fit in the same way, and we conclude that flux, toxicity and gene expression  
508 burden must all be accounted for to explain the observed fitness and epistasis values  
509 (Extended Data Figure 9).

### 510 **Statistical analyses**

511 All statistical analyses were performed in R (v.3.4.3) and figures were made using the R  
512 packages ggplot2 and rgl (for the 3D plot). Lower and upper hinges of box plots correspond  
513 to the first and third quartiles. Centre line is the median. Upper and lower whiskers extend  
514 from the hinges to the largest and lowest value no further than  $1.5\times$  the inter-quartile range  
515 away, respectively. Points outside this range are plotted individually.

### 516 **Data availability**

517 All genotype fitness estimates, along with their bootstrap 95% CIs and the number of  
518 replicates used to compute them, are provided in Supplementary Table 6. Raw and processed  
519 sequencing data has been submitted to GEO (accession number GSE115725).

### 520 **Code availability**

521 Custom code used in this study is available from the authors upon request.

522

523

## 524 **References**

- 525 1. DeBerardinis, R. J. & Thompson, C. B. Cellular metabolism and disease: What do metabolic  
526 outliers teach us? *Cell* **148**, 1132–1144 (2012).
- 527 2. Scriver, C. R. & Waters, P. J. Monogenic traits are not simple: lessons from phenylketonuria.  
528 *Trends Genet.* **15**, 267–272 (1999).
- 529 3. Badano, J. L. & Katsanis, N. Beyond Mendel: an evolving view of human genetic disease  
530 transmission. *Nat. Rev. Genet.* **3**, 779–789 (2002).
- 531 4. Manolio, T. A. *et al.* Finding the missing heritability of complex diseases. *Nature* **461**, 747–  
532 753 (2009).
- 533 5. Cooper, D. N., Krawczak, M., Polychronakos, C., Tyler-Smith, C. & Kehrer-Sawatzki, H. Where  
534 genotype is not predictive of phenotype: towards an understanding of the molecular basis of  
535 reduced penetrance in human inherited disease. *Hum. Genet.* **132**, 1077–1130 (2013).
- 536 6. Argmann, C. A., Houten, S. M., Zhu, J. & Schadt, E. E. A next generation multiscale view of  
537 inborn errors of metabolism. *Cell Metab.* **23**, 13–26 (2016).
- 538 7. Avery, L. & Wasserman, S. Ordering gene function: the interpretation of epistasis in  
539 regulatory hierarchies. *Trends Genet.* **8**, 312–316 (1992).
- 540 8. Segrè, D., DeLuna, A., Church, G. M. & Kishony, R. Modular epistasis in yeast metabolism.  
541 *Nat. Genet.* **37**, 77–83 (2005).
- 542 9. Onge, R. P. S. *et al.* Systematic pathway analysis using high-resolution fitness profiling of  
543 combinatorial gene deletions. *Nat. Genet.* **39**, 199–206 (2007).
- 544 10. Breslow, D. K. *et al.* A comprehensive strategy enabling high-resolution functional analysis of  
545 the yeast genome. *Nat. Methods* **5**, 711–718 (2008).
- 546 11. Beltrao, P., Cagney, G. & Krogan, N. J. Quantitative genetic interactions reveal biological  
547 modularity. *Cell* **141**, 739–745 (2010).
- 548 12. Lehner, B. Molecular mechanisms of epistasis within and between genes. *Trends Genet.* **27**,  
549 323–331 (2011).
- 550 13. Fu, C., Deng, S., Jin, G., Wang, X. & Yu, Z.-G. Bayesian network model for identification of  
551 pathways by integrating protein interaction with genetic interaction data. *BMC Syst. Biol.* **11**, (2017).
- 552 14. Karczewski, K. J. & Snyder, M. P. Integrative omics for health and disease. *Nat. Rev. Genet.*  
553 **19**, 299–310 (2018).
- 554 15. Schadt, E. E. Molecular networks as sensors and drivers of common human diseases. *Nature*  
555 **461**, 218–223 (2009).
- 556 16. Zhang, X., Kuivenhoven, J. A. & Groen, A. K. Forward Individualized Medicine from Personal  
557 Genomes to Interactomes. *Front. Physiol.* **6**, (2015).
- 558 17. Szappanos, B. *et al.* An integrated approach to characterize genetic interaction networks in  
559 yeast metabolism. *Nat. Genet.* **43**, 656–662 (2011).



- 560 18. Costanzo, M. *et al.* A global genetic interaction network maps a wiring diagram of cellular  
561 function. *Science* **353**, aaf1420–aaf1420 (2016).
- 562 19. Favé, M.-J. *et al.* Gene-by-environment interactions in urban populations modulate risk  
563 phenotypes. *Nat. Commun.* **9**, (2018).
- 564 20. Schleif, R. Regulation of the L-arabinose operon of *Escherichia coli*. *Trends Genet.* **16**, 559–  
565 565 (2000).
- 566 21. Englesberg, E. *et al.* L-arabinose-sensitive, L-ribulose 5-phosphate 4-epimerase-deficient  
567 mutants of *Escherichia coli*. *J. Bacteriol.* **84**, 137–146 (1962).
- 568 22. Poelwijk, F. J., Kiviet, D. J., Weinreich, D. M. & Tans, S. J. Empirical fitness landscapes reveal  
569 accessible evolutionary paths. *Nature* **445**, 383–386 (2007).
- 570 23. de Visser, J. A. G. M., Cooper, T. F. & Elena, S. F. The causes of epistasis. *Proc. R. Soc. B Biol.*  
571 *Sci.* **278**, 3617–3624 (2011).
- 572 24. Berger, D. & Postma, E. Biased Estimates of Diminishing-Returns Epistasis? Empirical  
573 Evidence Revisited. *Genetics* **198**, 1417–1420 (2014).
- 574 25. Dykhuizen, D. E., Dean, A. M. & Hart, D. L. Metabolic flux and fitness. *Genetics* **115**, 25–31  
575 (1987).
- 576 26. Clark, A. G. Mutation-selection balance and Metabolic Control Theory. *Genetics* **129**, 909–  
577 923 (1991).
- 578 27. Szathmary, E. Do deleterious mutations act synergistically? Metabolic Control Theory  
579 provides a partial answer. *Genetics* **133**, 127–132 (1993).
- 580 28. Dekel, E. & Alon, U. Optimality and evolutionary tuning of the expression level of a protein.  
581 *Nature* **436**, 588–592 (2005).
- 582 29. Orth, J. D., Thiele, I. & Palsson, B. Ø. What is flux balance analysis? *Nat. Biotechnol.* **28**, 245–  
583 248 (2010).
- 584 30. Blanquart, F., Achaz, G., Bataillon, T. & Tenaillon, O. Properties of selected mutations and  
585 genotypic landscapes under Fisher’s Geometric Model. *Evolution* **68**, 3537–3554 (2014).
- 586 31. Leblanc, D. J. & Mortlock, R. P. The metabolism of d-arabinose: Alternate kinases for the  
587 phosphorylation of d-ribulose in *Escherichia coli* and *Aerobacter aerogenes*. *Arch. Biochem. Biophys.*  
588 **150**, 774–781 (1972).
- 589 32. LeBlanc, D. J. & Mortlock, R. P. Metabolism of D-Arabinose: Origin of a D- Ribulokinase  
590 Activity in *Escherichia coli*. *J. Bacteriol.* **106**, 82–89 (1971).
- 591 33. LeBlanc, D. J. & Mortlock, R. P. Metabolism of D-Arabinose: a New Pathway in *Escherichia*  
592 *coli*. *J. Bacteriol.* **106**, 90–96 (1971).
- 593 34. Fritz, G. *et al.* Single Cell Kinetics of Phenotypic Switching in the Arabinose Utilization System  
594 of *E. coli*. *PLoS ONE* **9**, e89532 (2014).
- 595 35. Khlebnikov, A. & Keasling, J. D. Effect of *lacY* Expression on Homogeneity of Induction from  
596 the *P<sub>tac</sub>* and *P<sub>trc</sub>* Promoters by Natural and Synthetic Inducers. *Biotechnol. Prog.* **18**, 672–674  
597 (2002).

- 598 36. Wray, G. A. The evolutionary significance of cis-regulatory mutations. *Nat. Rev. Genet.* **8**,  
599 206–216 (2007).
- 600 37. Lutz, R. Independent and tight regulation of transcriptional units in *Escherichia coli* via the  
601 LacR/O, the TetR/O and AraC/I1-I2 regulatory elements. *Nucleic Acids Res.* **25**, 1203–1210 (1997).
- 602 38. Shultzaberger, R. K., Malashock, D. S., Kirsch, J. F. & Eisen, M. B. The Fitness Landscapes of  
603 cis-Acting Binding Sites in Different Promoter and Environmental Contexts. *PLoS Genet.* **6**, e1001042  
604 (2010).
- 605 39. Kinney, J. B., Murugan, A., Callan, C. G. & Cox, E. C. Using deep sequencing to characterize  
606 the biophysical mechanism of a transcriptional regulatory sequence. *Proc. Natl. Acad. Sci.* **107**,  
607 9158–9163 (2010).
- 608 40. Brewster, R. C., Jones, D. L. & Phillips, R. Tuning Promoter Strength through RNA Polymerase  
609 Binding Site Design in *Escherichia coli*. *PLoS Comput. Biol.* **8**, e1002811 (2012).
- 610 41. Bintu, L. *et al.* Transcriptional regulation by the numbers: models. *Curr. Opin. Genet. Dev.* **15**,  
611 116–124 (2005).
- 612 42. Lagator, M., Paixão, T., Barton, N. H., Bollback, J. P. & Guet, C. C. On the mechanistic nature  
613 of epistasis in a canonical cis-regulatory element. *eLife* **6**, (2017).
- 614 43. Kimura, M., Takatsuki, A. & Yamaguchi, I. Blastocidin S deaminase gene from *Aspergillus*  
615 *terreus* (BSD): a new drug resistance gene for transfection of mammalian cells. *Biochim. Biophys.*  
616 *Acta* **1219**, 653–659 (1994).
- 617 44. Sarkisyan, K. S. *et al.* Local fitness landscape of the green fluorescent protein. *Nature* **533**,  
618 397–401 (2016).
- 619 45. Levy, S. F. *et al.* Quantitative evolutionary dynamics using high-resolution lineage tracking.  
620 *Nature* **519**, 181–186 (2015).
- 621 46. Datsenko, K. A. & Wanner, B. L. One-step inactivation of chromosomal genes in *Escherichia*  
622 *coli* K-12 using PCR products. *Proc. Natl. Acad. Sci.* **97**, 6640–6645 (2000).
- 623 47. Hietpas, R. T., Jensen, J. D. & Bolon, D. N. A. Experimental illumination of a fitness landscape.  
624 *Proc. Natl. Acad. Sci.* **108**, 7896–7901 (2011).
- 625 48. Chou, H.-H., Delaney, N. F., Draghi, J. A. & Marx, C. J. Mapping the fitness landscape of gene  
626 expression uncovers the cause of antagonism and sign epistasis between adaptive mutations. *PLoS*  
627 *Genet.* **10**, e1004149 (2014).
- 628 49. Matuszewski, S., Hildebrandt, M. E., Ghenu, A.-H., Jensen, J. D. & Bank, C. A Statistical Guide  
629 to the Design of Deep Mutational Scanning Experiments. *Genetics* **204**, 77–87 (2016).
- 630 50. Beyond the Average: The Evolutionary Importance of Gene Interactions and Variability of  
631 Epistatic Effects. in *Epistasis and the Evolutionary Process* (eds. Wolf, J. B., Brodie III, E. D. & Wade,  
632 M. J.) 10 (Oxford University Press, 2000).
- 633 51. Kacser, H. & Burns, J. A. The Molecular Basis Of Dominance. *Genetics* **97**, 639–666 (1981).
- 634 52. Nguyen, T. N. M., Phan, Q. G., Duong, L. P. & Bertrand, K. P. Effects of carriage and  
635 expression of the Tn10 tetracycline-resistance operon on the fitness of *Escherichia coli* K12. *Mol.*  
636 *Biol. Evol.* **6**, 213–225 (1989).

- 637 53. Koch, A. L. The protein burden of lac operon products. *J. Mol. Evol.* **19**, 455–462 (1983).  
638 54. Bienick, M. S. *et al.* The Interrelationship between Promoter Strength, Gene Expression, and  
639 Growth Rate. *PLoS ONE* **9**, e109105 (2014).  
640 55. Kafri, M., MetzI-Raz, E., Jona, G. & Barkai, N. The Cost of Protein Production. *Cell Rep.* **14**,  
641 22–31 (2016).  
642 56. Brroks, S., Gelman, A., Jones, G. L. & Meng, X.-L. *Handbook of Markov Chain Monte Carlo*.  
643 (Chapman and Hall/CRC, 2011).

644

645 **Extended data** is linked to this paper.

646 **Supplementary Information** is linked to this paper.

647 **Acknowledgements** We thank A. Birgy, A. Decrulle, I. Matic, M. Deyell, A. Soler and D. Mazel for  
648 providing genetic material and technical advice, A. Baron, J. Chatel, A. Bridier-Nahmias and the  
649 CRI cytometry facility for technical assistance, and L.-M. Chevin, B. Gaut and E. Denamur for  
650 critical reading of the manuscript. MiSeq sequencing was performed using equipment provided by the  
651 Genetics Department of Bichat-Claude Bernard Hospital. This work was supported by the European  
652 Research Council under the European Union’s Seventh Framework Programme (ERC grant 310944 to  
653 O.T.). H.K. was supported by the Ecole Doctorale Frontières du Vivant (FdV) – Programme  
654 Bettencourt.

655 **Author Contributions** H.E.K., P.N. and O.T. conceived the idea for the experiment; H.E.K. and O.T.  
656 designed the experiments; H.E.K., C.E., A.C., A.E.C., M.A.M., G.G. and H.L.N. performed the  
657 experiments; H.E.K., P.N. and O.T. performed the analyses; H.E.K., P.N. and O.T. wrote the paper.

658 **Author Information** The authors declare no competing financial interests. Correspondence and  
659 requests for materials should be addressed to O.T. ([olivier.tenaillon@inserm.fr](mailto:olivier.tenaillon@inserm.fr)).

660

661

662

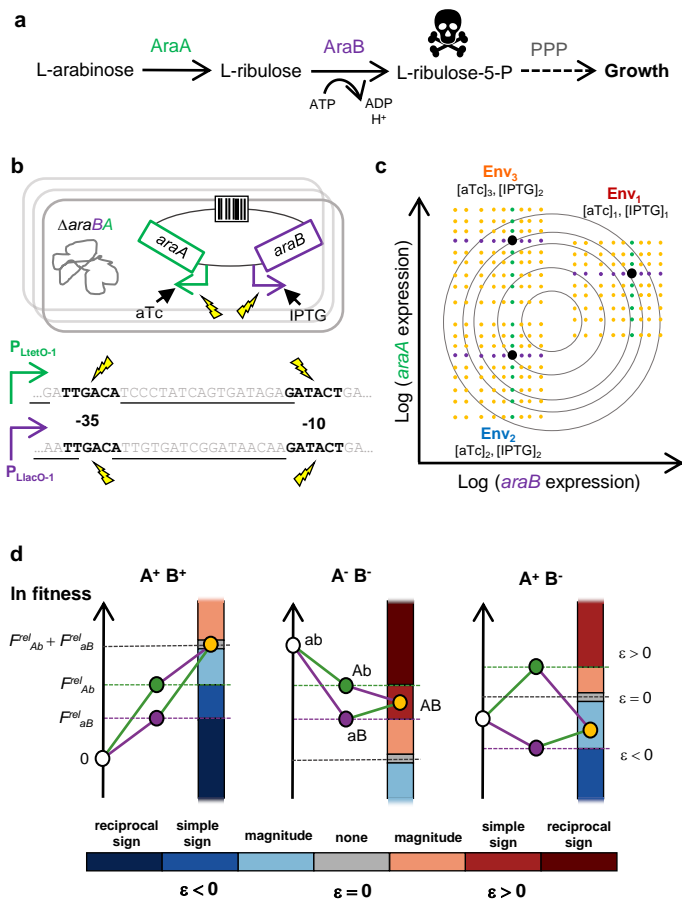

663

664 **Figure 1. High-throughput, quantitative mapping of fitness interactions between expression variants of**  
 665 **two metabolic genes in different expression-modifying environments. a**, L-arabinose pathway of *E. coli*. **b**,  
 666 *araA* and *araB* were each placed under the control of an artificial inducible promoter, making their expression  
 667 sensitive to the concentration of their respective inducers, anhydrotetracycline (aTc) and isopropyl β-D-1-  
 668 thiogalactopyranoside (IPTG). A barcoded library of mutant promoter combinations was then constructed, with  
 669 mutagenesis targeted in the -35 and -10 RNA-polymerase binding hexamers (black letters). Underlined bases are  
 670 annotated repressor binding sites. **c**, Competitive fitness was measured under different inducer concentrations  
 671 defining three environments. P<sub>LtetO-1</sub> single mutants – green; P<sub>LlacO-1</sub> single mutants – purple; double mutants –  
 672 orange. Contours are hypothetical fitness isoclines. **d**, Epistasis was quantified for all mutant promoter pairs  
 673 across environments. Epistasis can be categorised as either *magnitude* or *sign* type. *Sign epistasis* can be further  
 674 categorised as *simple* (effect of *one* mutation changes sign in presence of the other) or *reciprocal* (effects of  
 675 *both* mutations change sign in the presence of the other). Capitalised letters represent mutant alleles of P<sub>LtetO-1</sub>-  
 676 *araA* and P<sub>LlacO-1</sub>-*araB*. Superscript plus and minus denote that individual alleles are beneficial or deleterious,  
 677 respectively.



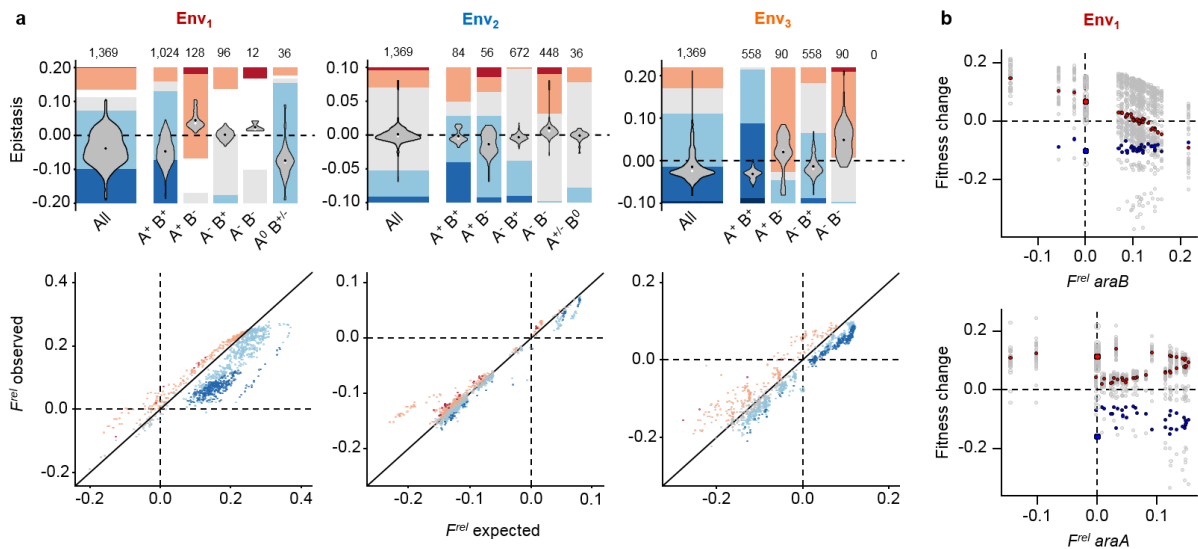

693

694 **Figure 3. Strength, types and trends of epistasis in different environments.** **a**, Violins show distribution of  
695 epistasis for different kinds of mutation pairs (white and black points show median and mean, respectively).  
696 Mutation pairs may be composed of mutations that are individually both beneficial (A<sup>+</sup> B<sup>+</sup>), both deleterious (A<sup>-</sup>  
697 B<sup>-</sup>) or mixed (A<sup>+</sup> B<sup>-</sup> and A<sup>-</sup> B<sup>+</sup>), or one of which confers an undetectable fitness effect on its own (A<sup>0</sup> B<sup>+/-</sup> and  
698 A<sup>+/-</sup> B<sup>0</sup>). The number of each such pair is shown above violins. Stacked bars show the fraction of different  
699 epistasis types detected (colours as in Fig. 1d, with white for pairs for which epistasis could not be computed).  
700 Scatterplots show fitness of double mutants against that expected if mutation effects combined additively. Points  
701 coloured as in Fig. 1d. **b**, Relationship between background fitness and the fitness change induced by  
702 introducing a mutation in the second promoter, in Env<sub>1</sub>. Top: *araA* promoter mutations added to existing *araB*  
703 promoter mutations; bottom: inverse case. Coloured points highlight particular alleles. Top: P<sub>L<sub>tetO-1</sub></sub>-*araA* alleles  
704 T2C (red) and G7C (blue). Bottom: P<sub>L<sub>lacO-1</sub></sub>-*araB* alleles T1A (red) and C11A (blue). Large points show effect of  
705 alleles in the wildtype background.

706

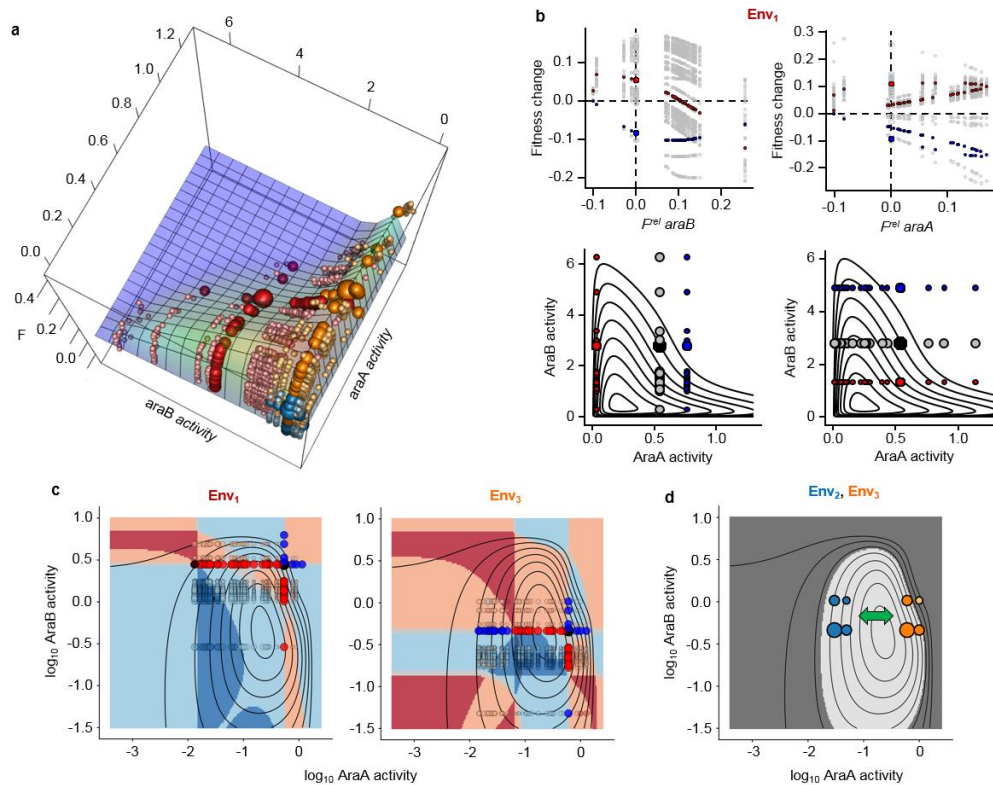

707

708 **Figure 4. Mechanistic basis of heterogeneous, environmentally dependent intergenic epistasis.** **a**, Surface  
 709 shows fitted activity-fitness model. Spheres are positioned according to predicted activity levels and *observed*  
 710 relative fitness (Env<sub>1</sub> – red; Env<sub>2</sub> – blue; Env<sub>3</sub> - orange). Three largest spheres are wildtype, intermediate-sized  
 711 spheres are single mutants, and small, pale spheres are double mutants. **b**, Upper plots recapitulate Fig. 3b, with  
 712 fitness values predicted by the model. Lower plots show predicted position in the fitness landscape of  
 713 highlighted genotypes from upper plots (black point is wildtype; other large points are single mutants, grey for  
 714 the gene considered to be carrying the “background” alleles). **c**, Fitness surface shown on log activity scale.  
 715 Intergenic epistasis types emerging from model are indicated by surface colour (colours as in Fig. 1d). Predicted  
 716 epistasis is determined as non-significant (grey) if magnitude is less than 0.005. Large black points are wildtype.  
 717 Smaller, opaque blue, red and black points are single mutants, coloured by *observed*  $F^{rel}$  (deleterious, beneficial  
 718 and neutral, respectively). Transparent points are double mutants, coloured by observed epistasis type and sized  
 719 by epistasis strength. **d**, Dark grey area is a hypothetical disease threshold, at 40% of maximum fitness. Points  
 720 show four genotypes in Env<sub>2</sub> (blue) and Env<sub>3</sub> (orange): the wildtype (largest), C11A of  $P_{LacO-1}$ -*araA* and G7T of  
 721  $P_{LacO-1}$ -*araB* (intermediate size), and the resulting double-mutant (smallest). Green arrow represents a change in  
 722 enzyme activity levels caused by non-genetic factors like ageing or environmental exposure, or by further  
 723 mutations. A toxicity-induced disease state results here from one particular combination of alleles and  
 724 environment (pale orange point).
